# Supplementary material for: Characterization of the Complete Mitochondrial Genome of the Spotted Catfish Arius maculatus (Thunberg, 1792) and Its Phylogenetic Implications
Source: MDPI journal article supplement (doi:10.3390/genes13112128), 2022-11-16
Supplement: s1 [file s1]

**Supplementary Figure S1.** Graphical illustration showing the AT- and GC-skew in the PCGs of the mtDNA of *A. maculatus*.

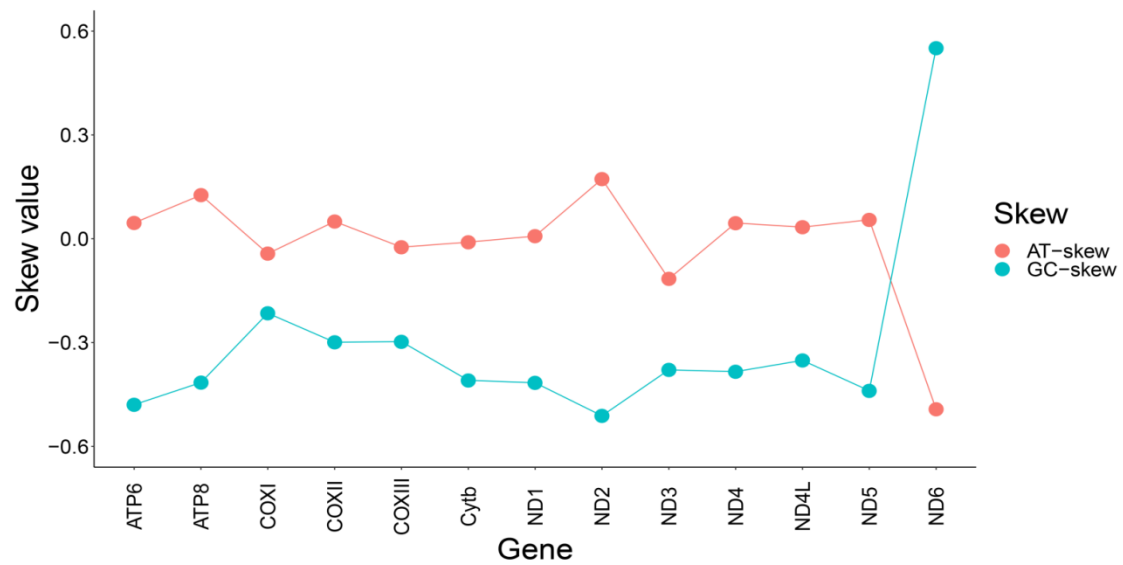

### Supplementary table S1

Primers used to verify the accuracy of the assembled mtDNA sequence.

| Name | Primer sequences (5'–3')  | Product length<br>(bp) | T <sub>m</sub> (°C) |
|------|---------------------------|------------------------|---------------------|
| CuF1 | GAATACTACGGACGGCACTCTGAA  | 5104                   | 56                  |
| CuR1 | GAAAAAATAGTAAGGTCCACAGAA  |                        |                     |
| CuF2 | ACCTACGACTATGCTACGCTATGA  | 4621                   | 56                  |
| CuR2 | AATAATCATAACAACATCTACGAAA |                        |                     |
| CuF3 | GCTACCTAAACAACCGACTAATCTC | 4856                   | 52                  |
| CuR3 | GAGTGGTAGTAGTTTGTGTAAGCC  |                        |                     |
| CuF4 | CCTCCAAGCAGTAATCTACAACCG  | 5516                   | 50                  |
| CuR4 | TTTCATTTCTCTTTCAGCGTTCCC  |                        |                     |

**Supplementary Table S2** The information of Superfamily, Genera, Species, Size, Genbank number, and Identity in the Siluriformes.

| Superfamily | Genera        | Species                            | Size (bp) | Genbank No. | Identity (%) |
|-------------|---------------|------------------------------------|-----------|-------------|--------------|
| Ariidae     | Arius         | <i>Arius maculatus</i>             | 16710     | MN604079    | 100          |
|             |               | <i>Arius arius</i>                 | 16711     | KX211965    | 99.74        |
|             | Netuma        | <i>Netuma thalassina</i>           | 16711     | KU986659    | 99.80        |
|             | Occidentarius | <i>Occidentarius platypogon</i>    | 16714     | NC_037469   | 90.14        |
|             | Ariopsis      | <i>Ariopsis seemanni</i>           | 16830     | AP012003    | 90.31        |
|             | Bagre         | <i>Bagre panamensis</i>            | 16718     | NC_037470   | 88.50        |
| Pangasiidae | Pangasius     | <i>Pangasius pangasius</i>         | 16476     | KC572135    | 85.23        |
|             |               | <i>Pangasius larnaudii</i>         | 16471     | AP012018    | 84.95        |
|             | Pangasianodon | <i>Pangasianodon gigas</i>         | 16533     | AY762971    | 84.53        |
|             |               | <i>Pangasianodon hypophthalmus</i> | 16522     | KC846907    | 85.20        |
| Bagridae    | Horabagrus    | <i>Horabagrus brachysoma</i>       | 16567     | KU870467    | 83.79        |
|             |               | <i>Horabagrus nigricollaris</i>    | 16561     | MG986722    | 84.35        |
|             | Tachysurus    | <i>Tachysurus fulvidraco</i>       | 16527     | HM641815    | 83.84        |
|             |               | <i>Tachysurus intermedius</i>      | 16532     | KY962416    | 83.82        |
|             |               | <i>Tachysurus ussuriensis</i>      | 16536     | KC188782    | 83.73        |
|             | Pseudobagrus  | <i>Pseudobagrus ondon</i>          | 16534     | KF514424    | 83.76        |
|             | Mystus        | <i>Mystus cavasius</i>             | 16554     | KU870465    | 83.73        |
|             | Auchenoglanis | <i>Auchenoglanis occidentalis</i>  | 16535     | AP012005    | 83.85        |
| Mochokinae  | Synodontis    | <i>Synodontis schoutedeni</i>      | 16540     | AP012023    | 84.46        |
| Clariidae   | Clarias       | <i>Clarias gariepinus</i>          | 16508     | KT001082    | 84.07        |
|             |               | <i>Clarias fuscus</i>              | 16518     | KF188424    | 83.68        |
| Ictaluridae | Ictalurus     | <i>Ictalurus furcatus</i>          | 16499     | MG570460    | 83.40        |

|           |               |                                 |       |          |       |
|-----------|---------------|---------------------------------|-------|----------|-------|
| Siluridae | Ompok         | <i>Ompok bimaculatus</i>        | 16482 | KY887474 | 83.40 |
|           | Silurus       | <i>Silurus soldatovi</i>        | 16527 | AB860299 | 83.18 |
|           |               | <i>Silurus meridionalis</i>     | 16526 | JX087350 | 83.15 |
|           |               | <i>Silurus asotus</i>           | 16521 | AP012022 | 83.12 |
| Sisoridae | Glaridoglanis | <i>Glaridoglanis andersonii</i> | 16532 | JQ026254 | 83.25 |
